# Supplementary material for: Epigenetic mechanisms of lung carcinogenesis involve differentially methylated CpG sites beyond those associated with smoking
Source: PubMed Central journal article supplement (PMC9288379; doi:10.1007/s10654-022-00877-2), 2022-05-20

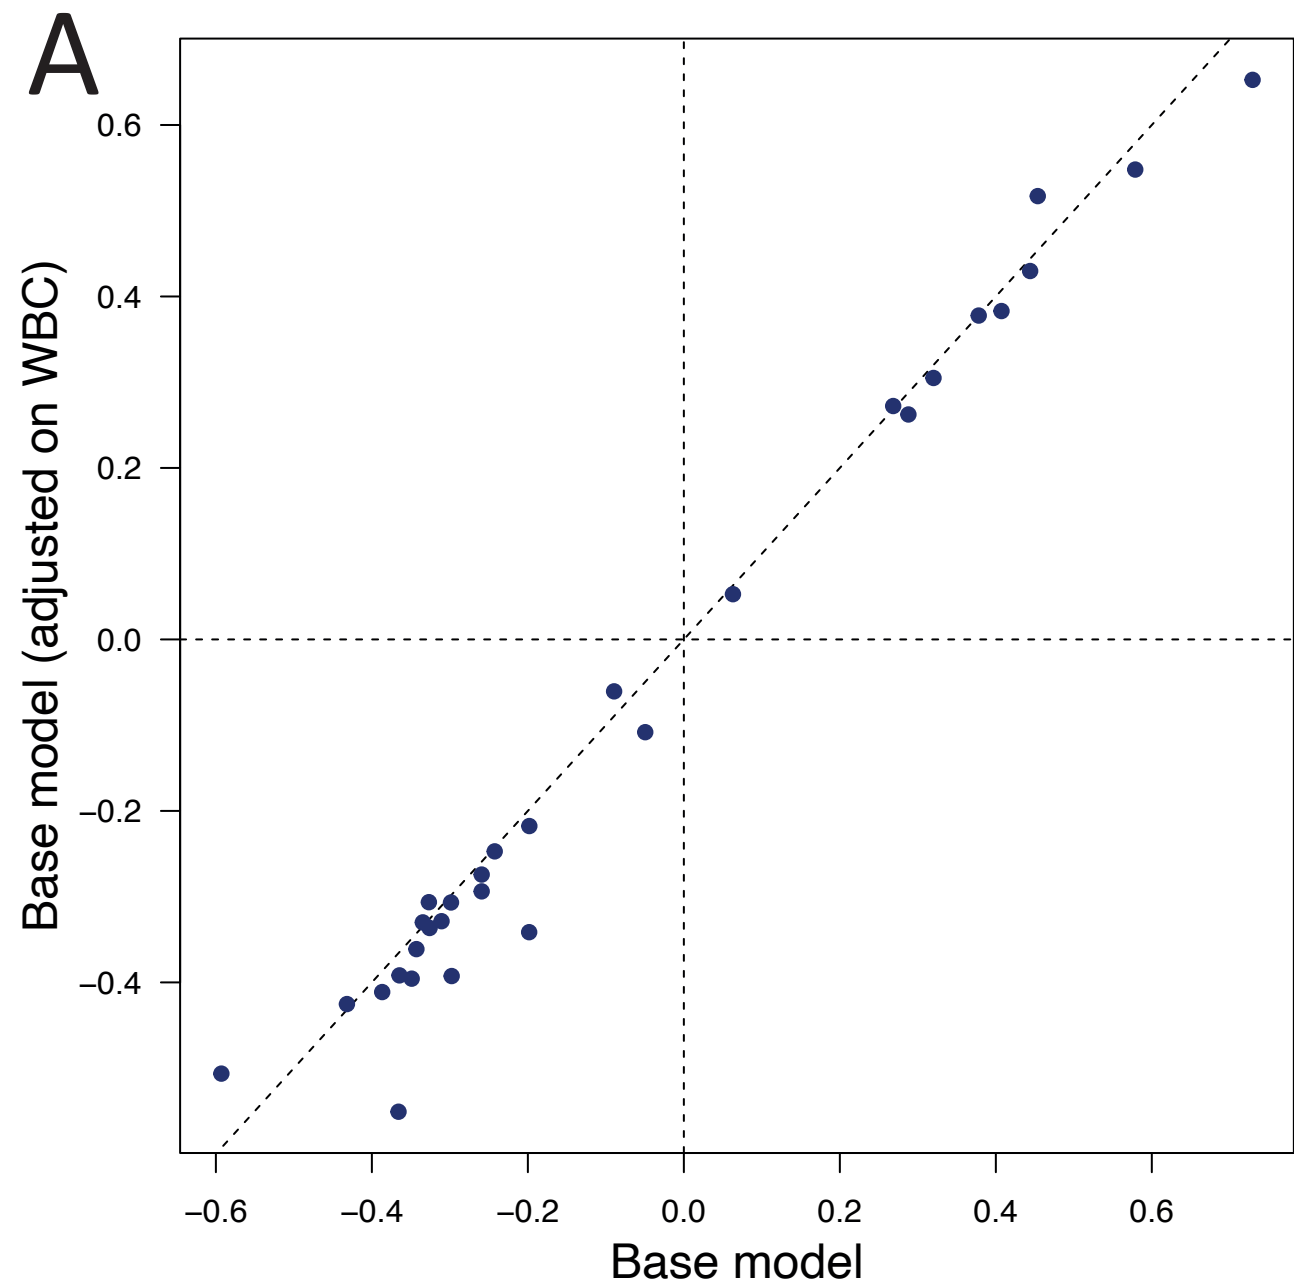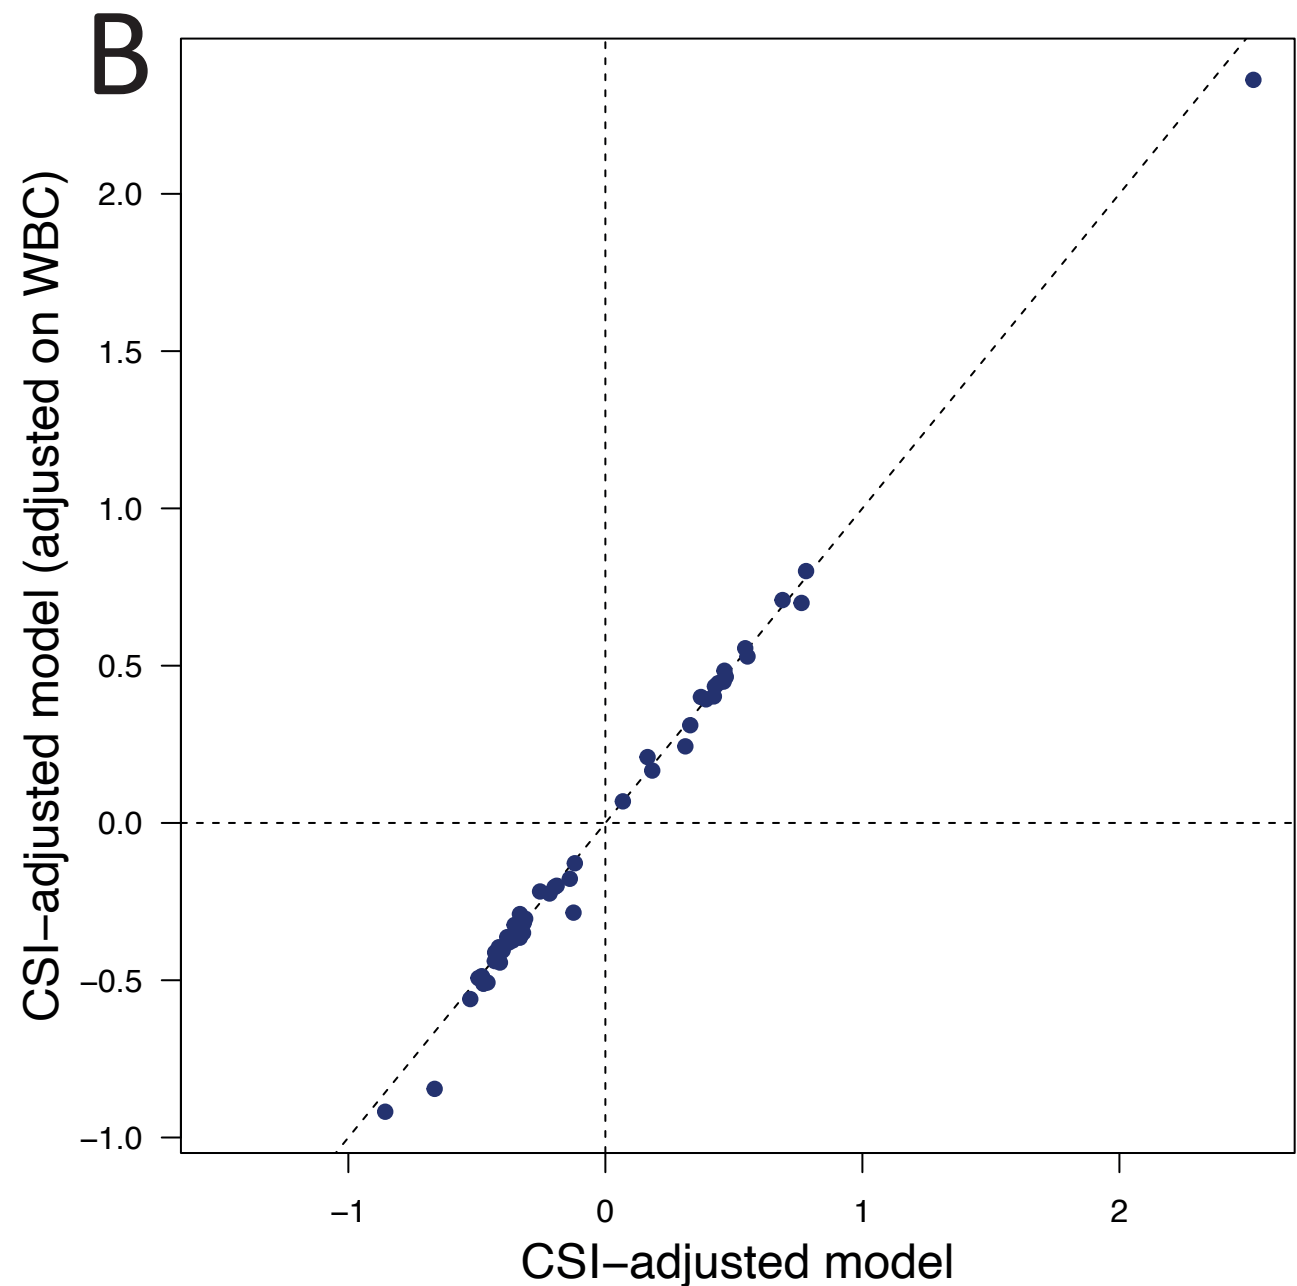

Supplement: 10654_2022_877_MOESM2_ESM.pdf [file 10654_2022_877_MOESM2_ESM.pdf]
